# Supplementary material for: Single-crystalline lead halide perovskite wafers for high performance photodetectors
Source: Royal Society of Chemistry journal article supplement (doi:10.1039/c9tc01309a), 2019-01-01
Supplement: c9tc01309a1.pdf [file c9tc01309a1.pdf]

ARTICLE

## Supporting Information

### Single-crystalline Lead Halide Perovskite Wafer for High Performance Photodetectors

Juan Gao,<sup>a</sup> Qiangbing Liang,<sup>a</sup> Guohui Li,<sup>a,b</sup> Ting Ji,<sup>a</sup> Yucheng Liu,<sup>c</sup> Mingming Fan,<sup>a</sup>

Yuying Hao,<sup>a,b</sup> Shengzhong (Frank) Liu,<sup>c</sup> Yucheng Wu<sup>b,\*</sup> and Yanxia Cui<sup>a,b,\*</sup>

*a.* College of Physics and Optoelectronics, Key Lab of Advanced Transducers and Intelligent Control System of Ministry of Education, Taiyuan University of Technology, Taiyuan 030024, China

*b.* Key Laboratory of Interface Science and Engineering in Advanced Materials, Taiyuan University of Technology, Taiyuan 030024, China

*c.* Key Laboratory of Applied Surface and Colloid Chemistry National Ministry of Education, Shaanxi Engineering Lab for Advanced Energy Technology School of Materials Science and Engineering Shaanxi Normal University

\*Corresponding author: yanxiacui@gmail.com (Y. Cui); wyc@tyut.edu.cn (Y. Wu)

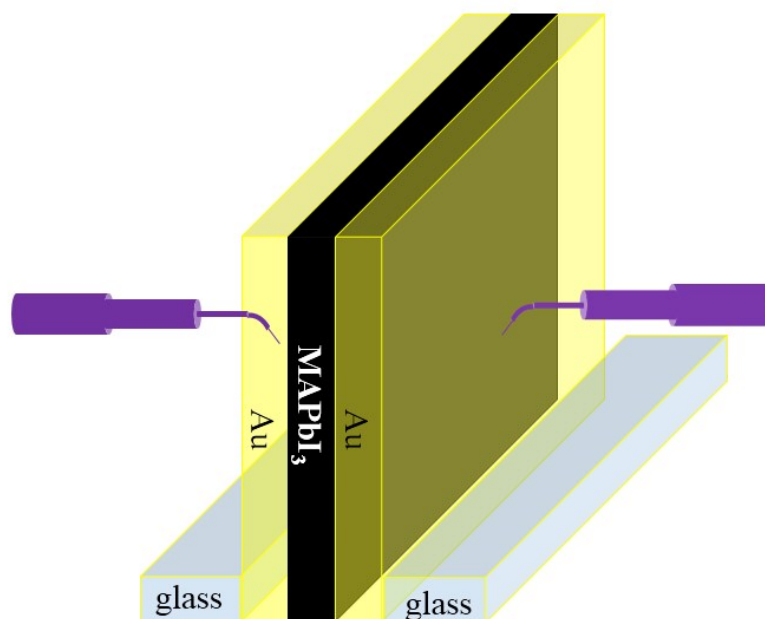

S1. Schematic diagram for measuring the electrical property of the hole-only device within the probe station.

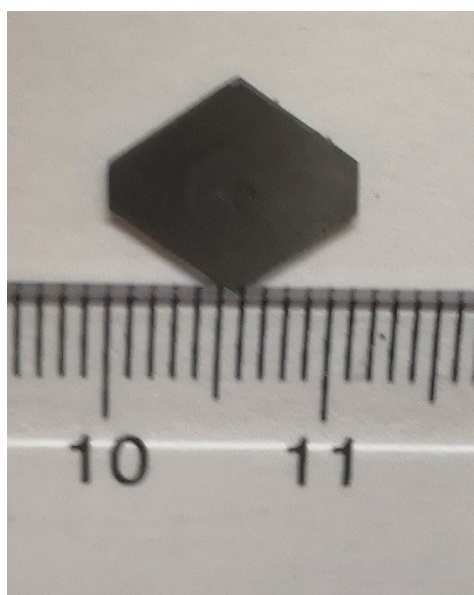

S2. The picture of the as-grown large perovskite thin wafer.

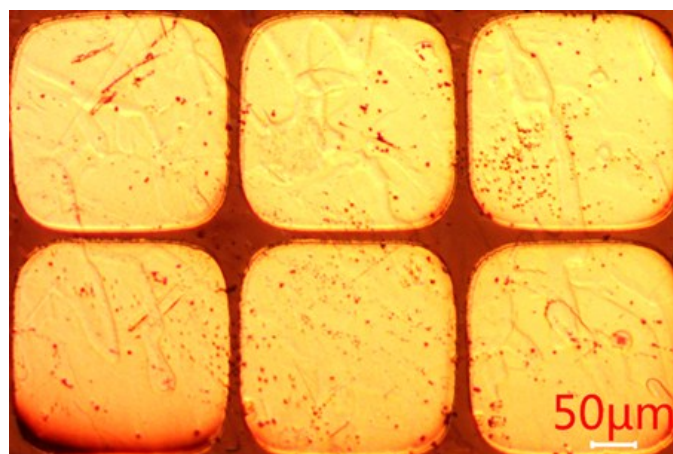

S3. The picture of the electrodes of photodetectors prepared on the as-grown perovskite wafers.

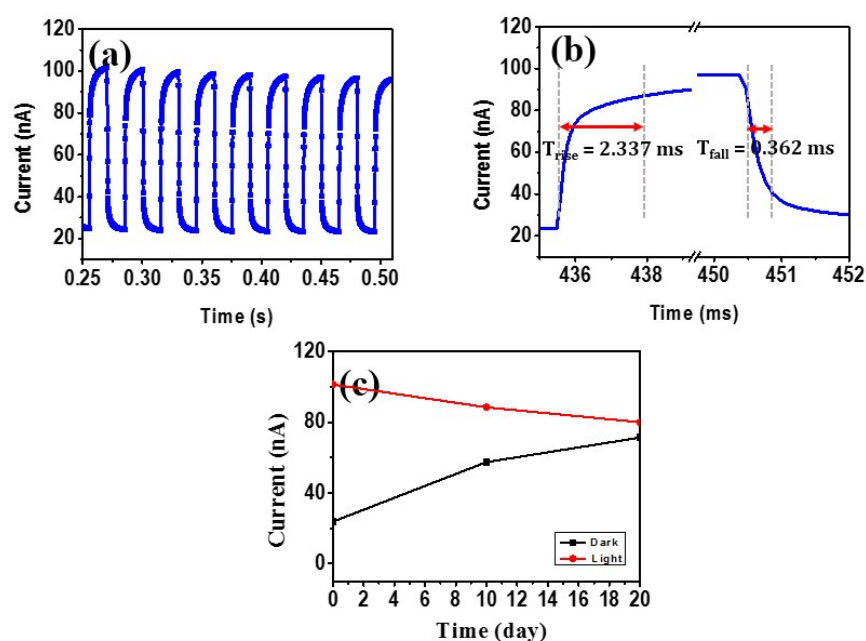

S4. Characterizations of the photodetector made of the poly-crystalline MAPbI<sub>3</sub> film. (a) Transient photocurrent response with multiple on/off cycles measured at 1V bias voltage under 505 nm, 10.2 mW/cm<sup>2</sup> illumination. (b) Rise and fall time measurement. (c) Stability test with the photodetector stored in air.

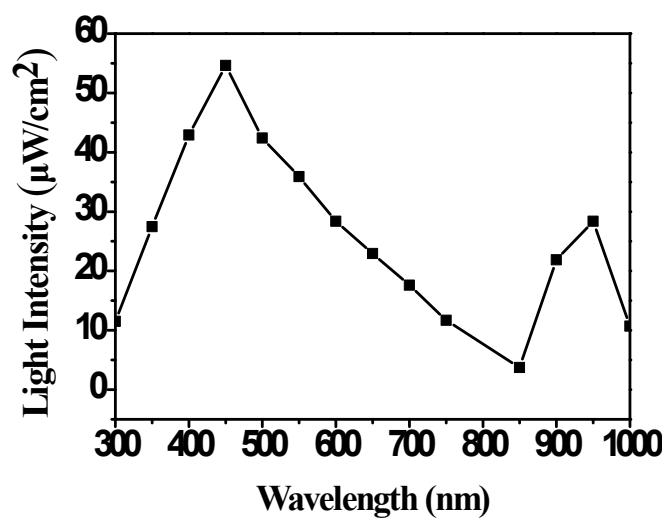

S5. Power densities of illuminations versus wavelength for the Xe lamp.
